# Supplementary material for: Identification of Core Genes of Toll-like Receptor Pathway from Lymantria dispar and Induced Expression upon Immune Stimulant
Source: MDPI journal article supplement (doi:10.3390/insects12090827), 2021-09-14
Supplement: s1 [file s1]

**Table S1.** GenBank accession numbers of TLRs form other insect species.

| <b>Toll/TLR</b> | <b>Species</b>                   | <b>GenBank accession No.</b> |
|-----------------|----------------------------------|------------------------------|
| TLR             | <i>Helicoverpa armigera</i>      | XP_021197312.1               |
| TLR3            | <i>Helicoverpa armigera</i>      | XP_021187138.1               |
| TLR4            | <i>Helicoverpa armigera</i>      | XP_021190980.1               |
| Tollo           | <i>Helicoverpa armigera</i>      | XP_021181728.1               |
| TLR6            | <i>Helicoverpa armigera</i>      | XP_021181725.1               |
| TLR7            | <i>Helicoverpa armigera</i>      | XP_021193405.1               |
| TLR13           | <i>Helicoverpa armigera</i>      | XP_021199918.1               |
| TLR             | <i>Bombyx mori</i>               | XP_004925675.1               |
| 18w             | <i>Bombyx mori</i>               | NP_001116821.1               |
| TLR3            | <i>Bombyx mori</i>               | XP_012549875.2               |
| TLR4            | <i>Bombyx mori</i>               | XP_012546905.2               |
| TLR6            | <i>Bombyx mori</i>               | XP_012553339.2               |
| TLR7            | <i>Bombyx mori</i>               | XP_004921732.2               |
| Tollo           | <i>Bombyx mori</i>               | XP_004921742.1               |
| TLR             | <i>Trichoplusia ni</i>           | XP_026724543.1               |
| TLR6            | <i>Trichoplusia ni</i>           | XP_026733863.1               |
| TLR7            | <i>Trichoplusia ni</i>           | XP_026733855.1               |
| Tollo           | <i>Trichoplusia ni</i>           | XP_026733502.1               |
| TLR13           | <i>Trichoplusia ni</i>           | XP_026737397.1               |
| 18w             | <i>Apis mellifera</i>            | NP_001013379.1               |
| TLR6            | <i>Apis mellifera</i>            | XP_393712.2                  |
| Tollo           | <i>Apis mellifera</i>            | XP_393713.3                  |
| Toll            | <i>Drosophila melanogaster</i>   | AA028941.1                   |
| 18w             | <i>Drosophila melanogaster</i>   | AAF57509.1                   |
| Toll3           | <i>Drosophila melanogaster</i>   | AAF54021.3                   |
| Toll4           | <i>Drosophila melanogaster</i>   | AAF52747.3                   |
| Toll5           | <i>Drosophila melanogaster</i>   | AAF53306.1                   |
| Toll6           | <i>Drosophila melanogaster</i>   | AAF49645.1                   |
| Toll7           | <i>Drosophila melanogaster</i>   | AAF57514.1                   |
| Tollo           | <i>Drosophila melanogaster</i>   | AAF49650.1                   |
| Toll9           | <i>Drosophila melanogaster</i>   | AAF51581.1                   |
| TLR             | <i>Manduca sexta</i>             | XP_030022832.2               |
| TLR2            | <i>Manduca sexta</i>             | XP_030022594.2               |
| TLR3            | <i>Manduca sexta</i>             | XP_030032678.1               |
| TLR6            | <i>Manduca sexta</i>             | XP_030022524.1               |
| TLR7            | <i>Manduca sexta</i>             | XP_030022522.1               |
| Tollo           | <i>Manduca sexta</i>             | XP_030027852.2               |
| TLR             | <i>Spodoptera litura</i>         | XP_022826408.1               |
| TLR3            | <i>Spodoptera litura</i>         | XP_022823165.1               |
| TLR4            | <i>Spodoptera litura</i>         | XP_022821797.1               |
| TLR6            | <i>Spodoptera litura</i>         | XP_022828061.1               |
| TLR7            | <i>Spodoptera litura</i>         | XP_022828080.1               |
| Tollo           | <i>Spodoptera litura</i>         | XP_022828179.1               |
| TLR             | <i>Pieris rapae</i>              | XP_022126205.1               |
| Tollo           | <i>Pieris rapae</i>              | XP_022117126.1               |
| TLR3            | <i>Pieris rapae</i>              | XP_022116081.1               |
| TLR6            | <i>Pieris rapae</i>              | XP_022121761.1               |
| TLR7            | <i>Pieris rapae</i>              | XP_022129543.1               |
| TLR             | <i>Aedes aegypti</i>             | XP_021713350.1               |
| TLR7            | <i>Aedes aegypti</i>             | XP_001655730.1               |
| Tollo           | <i>Aedes aegypti</i>             | XP_001649813.1               |
| TLR13           | <i>Aedes aegypti</i>             | XP_021701630.1               |
| TLR             | <i>Leptinotarsa decemlineata</i> | XP_023026371.1               |
| TLR3            | <i>Leptinotarsa decemlineata</i> | XP_023021962                 |
| Tollo           | <i>Leptinotarsa decemlineata</i> | XP_023024566.1               |
| TLR6            | <i>Leptinotarsa decemlineata</i> | XP_023013197.1               |
| TLR7            | <i>Leptinotarsa decemlineata</i> | XP_023022264                 |
| TLR13           | <i>Leptinotarsa decemlineata</i> | XP_023020393.1               |

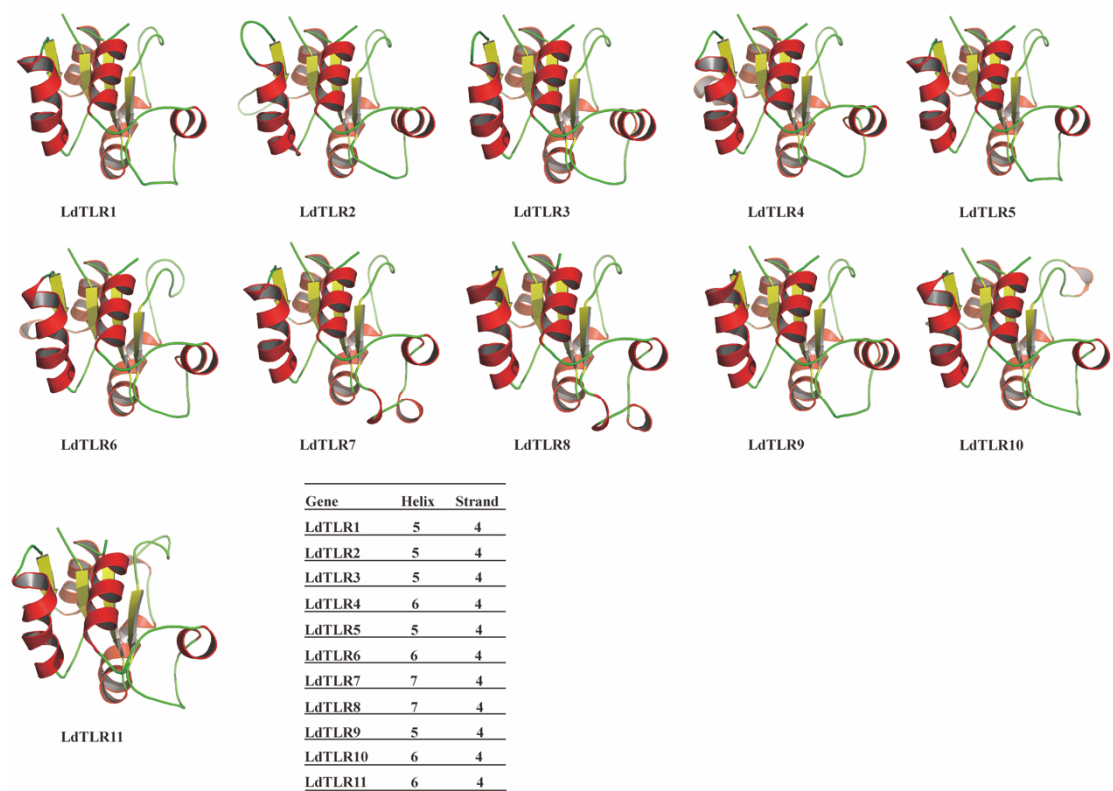

**Figure S1.** 3D structures of TIR domains in 11 LdTLRs.
